# Supplementary material for: Exploring the Effects of Human Bone Marrow-Derived Mononuclear Cells on Angiogenesis In Vitro
Source: MDPI journal article supplement (doi:10.3390/ijms241813822), 2023-09-07
Supplement: s1 [file s1]

## Appendix with Supplemental Figures

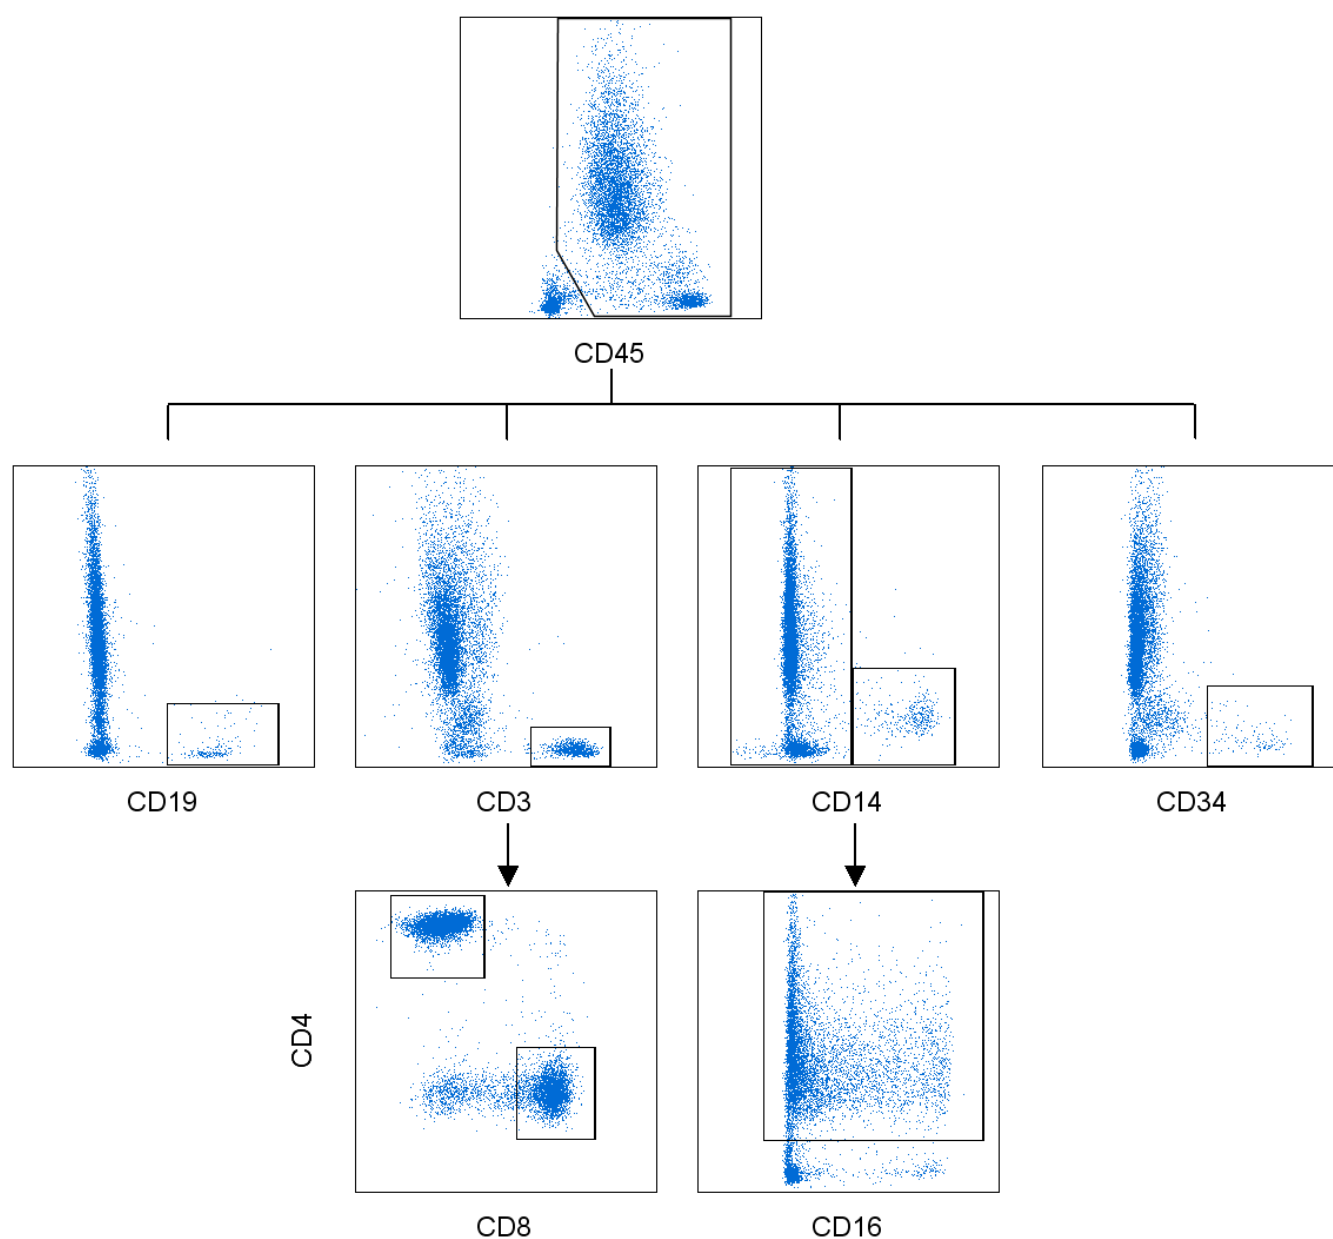

**Supplemental Figure S1.** Gating strategy for REX-001. Cells were selected from side scatter-area vs FSC-H, then single cells were selected from FSC-H vs FSC-A and subsequently the viable cells were selected using 7AAD and FSC-H. The CD45+ cells were selected from the viable cells and subsequently CD 19+, CD3+, CD14+/- and CD34+ cells were selected from the CD45+ cells. The CD3+ cells were further specified in CD4+ and CD8+ cells. The CD14- selection was further specified for CD16+ cells.

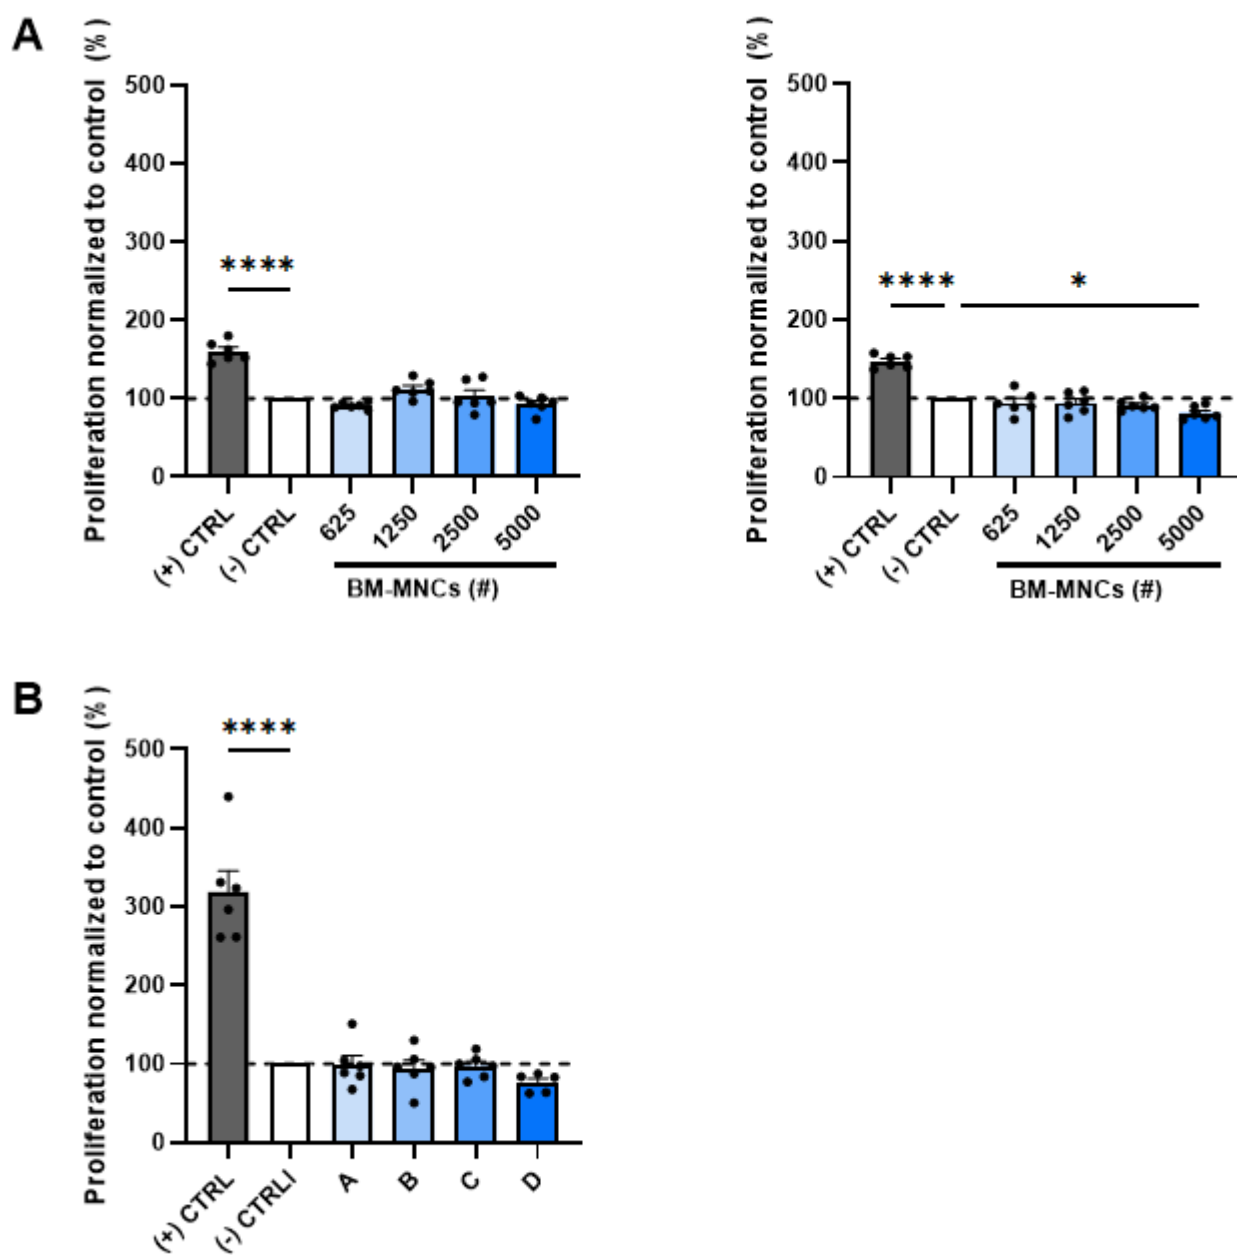

**Supplemental Figure S2.** Quantification of HUVEC proliferation after treatment with either **(A)** BM-MNCs (625, 1250, 2500 or 5000 cells added) or with **(B)** BM-MNC conditioned medium A, B, C and D respectively representative for 2500, 5000, 10.000 or 20.000 BM-MNCs. Graph S2A shows 2 experiments performed with BM-MNC isolates manufactured from 2 different bone marrow samples. Graph S2B is an experiment performed with BM-MNC conditioned medium. Data are presented as mean  $\pm$  SEM with datapoints in sextuplicate. \* $p < 0.05$ , \*\*\* $p < 0.001$ , \*\*\*\* $p \leq 0.0001$  by One-Way ANOVA.

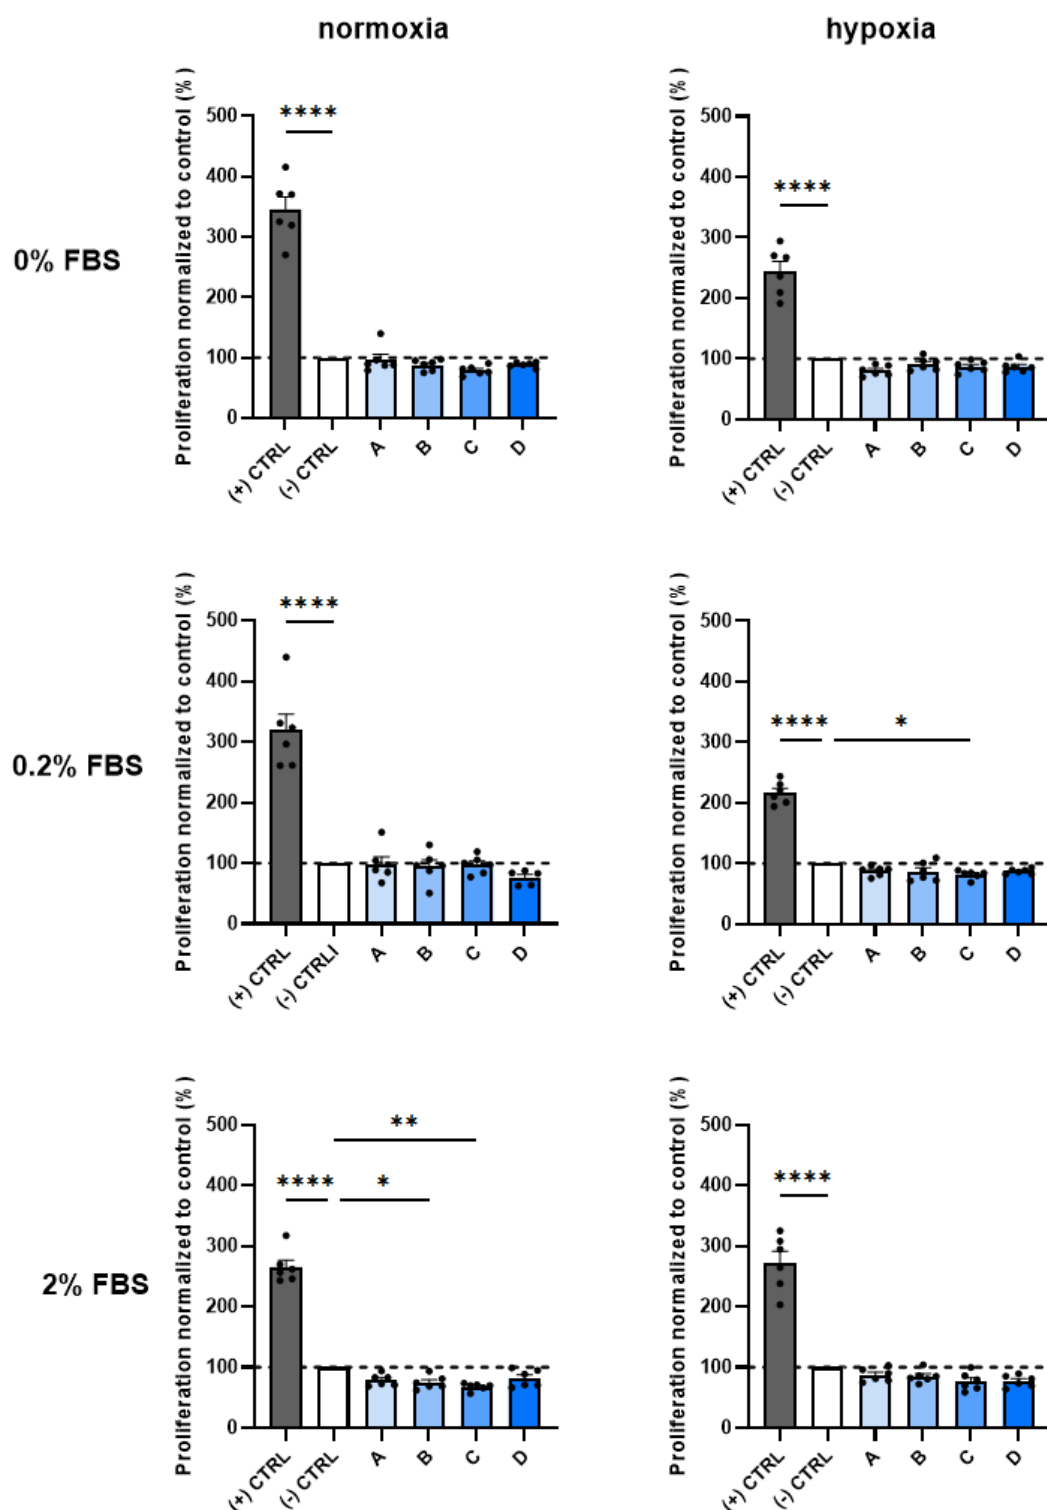

**Supplemental Figure S3.** Quantification of HUVEC proliferation after treatment with BM-MNC conditioned medium in EBM-2 medium without FBS, with 0.2% or 2% PBS in normoxic or hypoxic conditions. A, B, C and D represent conditioned medium with respectively 2500, 5000, 10.000 or 20.000 BM-MNCs. The graphs shown are a representative of 2 experiments. Data are presented as mean  $\pm$  SEM with datapoints in sextuplicate. \* $p < 0.05$ , \*\* $p < 0.01$ , \*\*\* $p < 0.001$ , \*\*\*\* $p \leq 0.0001$  by One-Way ANOVA.

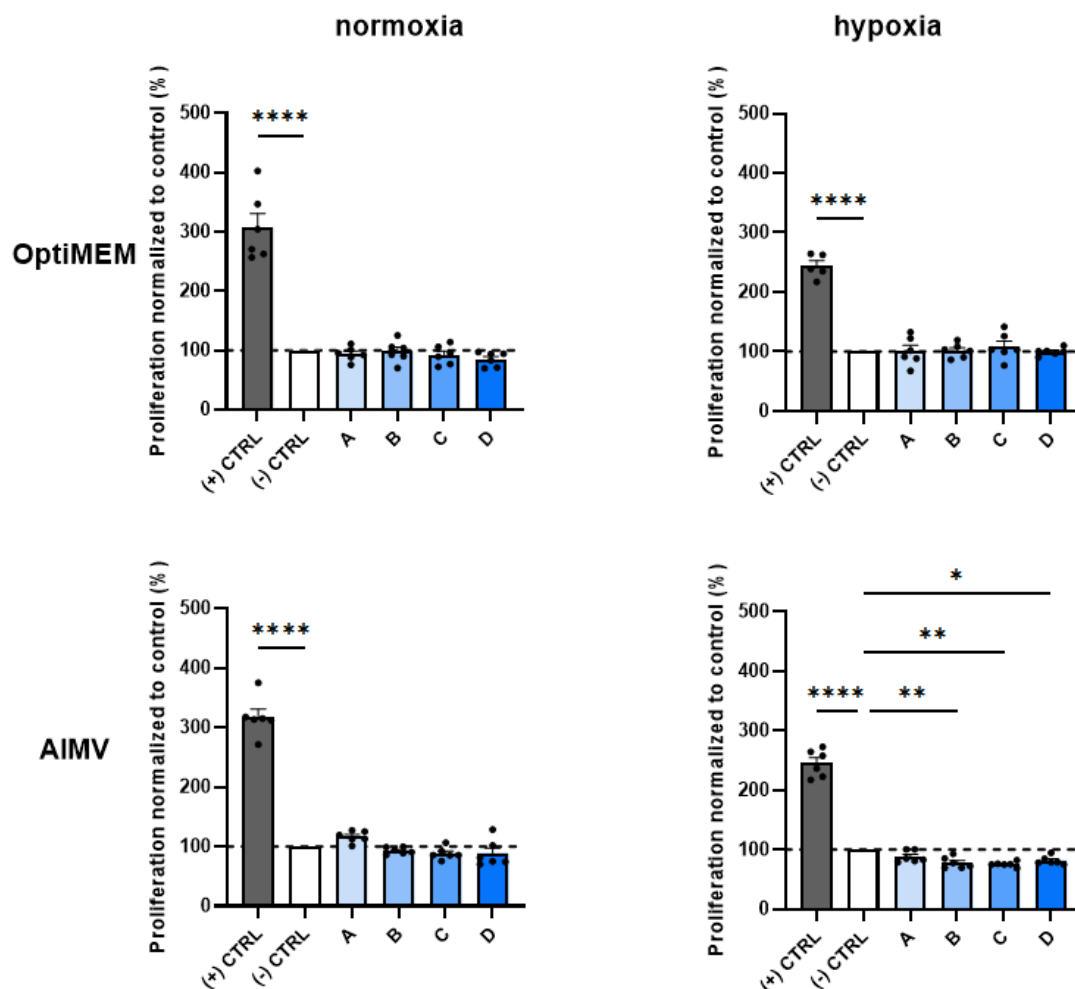

**Supplemental Figure S4.** Quantification of HUVEC proliferation after treatment with BM-MNC conditioned medium in OptiMEM or AIMV culture medium in normoxic or hypoxic conditions. A, B, C and D represent conditioned medium with respectively 2500, 5000, 10.000 or 20.000 BM-MNCs. The graphs shown are a representative of 2 experiments. Data are presented as mean  $\pm$  SEM with datapoints in sextuplicate. \* $p < 0.05$ , \*\* $p < 0.01$ , \*\*\*\* $p \leq 0.0001$  by One-Way ANOVA.

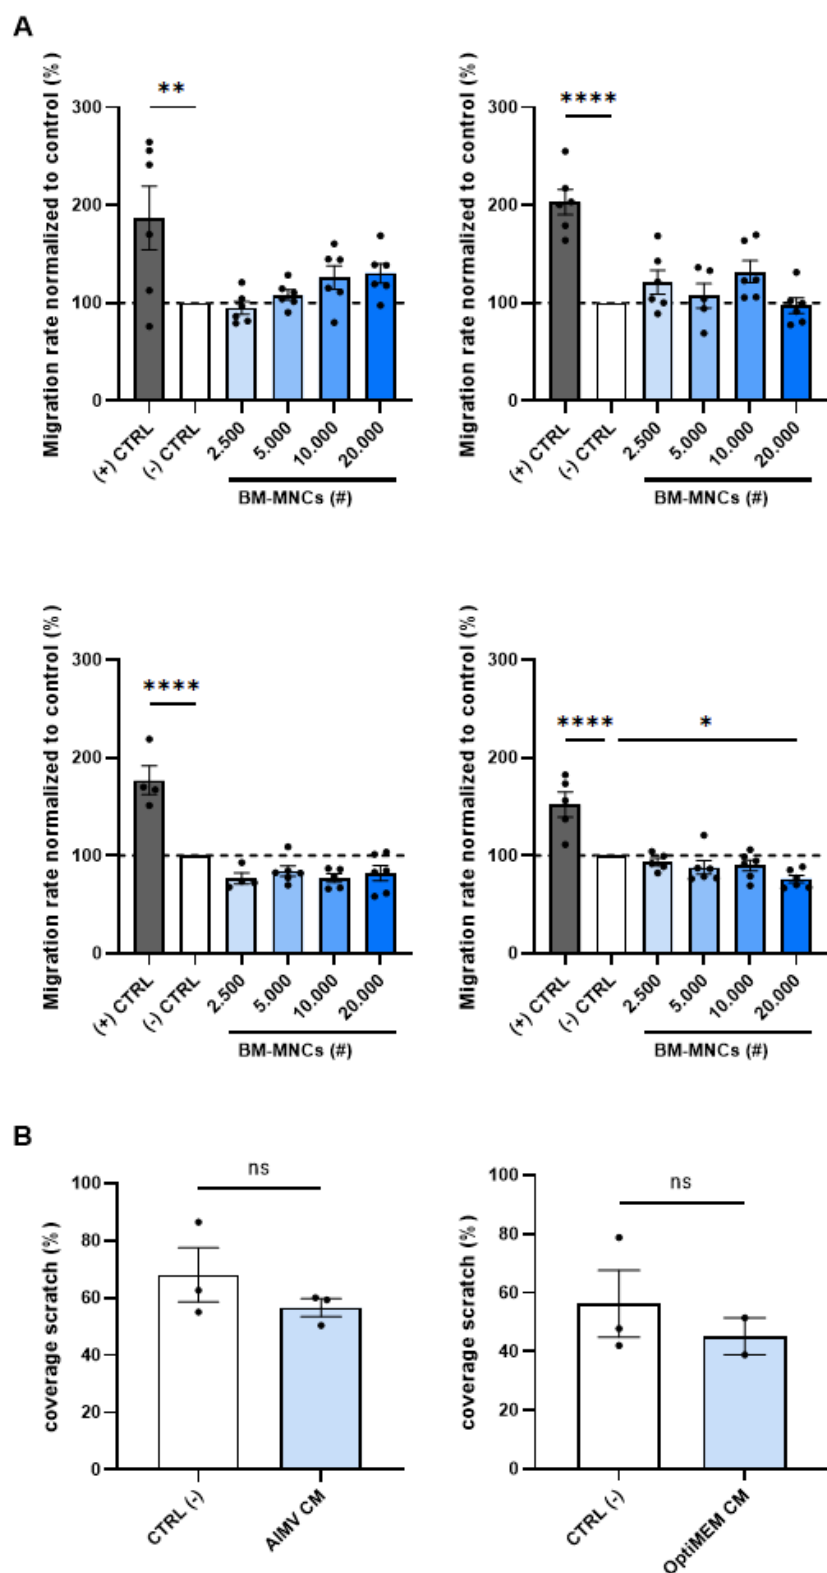

**Supplemental Figure S5.** Quantification of HUVEC scratch-wound healing after treatment with BM-MNCs (2,500, 5,000, 10,000 or 20,000 cells added) (**A**) or after treatment with BM-MNC conditioned medium (CM) of AIMV or OptiMEM (**B**). These graphs show the additional 5 experiments performed with BM-MNC isolates manufactured from 5 different bone marrow samples and conditioned medium manufactured from 1 bone marrow sample, respectively. Data are presented as mean  $\pm$  SEM with datapoints in sextuplicate (**A**) or triplicate (**B**). *ns* non-significant,  $*p \leq 0.05$ ,  $**p \leq 0.01$ ,  $***p \leq 0.001$ ,  $****p \leq 0.0001$  by One-Way ANOVA.

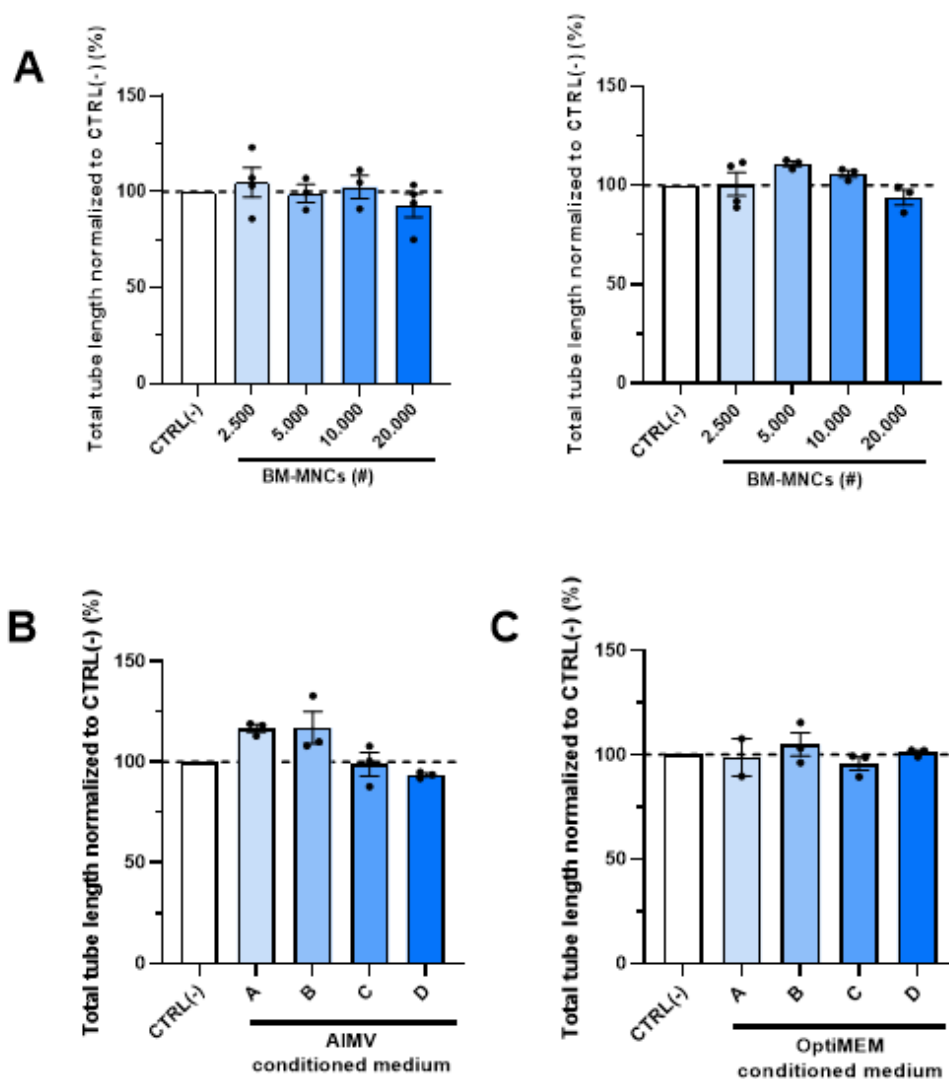

**Supplemental Figure S6.** Quantification of HUVEC tube formation length with the presence of BM-MNC isolates of two different donor batches (A), after treatment with (B) BM-MNC conditioned AIMV medium or (C) BM-MNC conditioned OptiMEM medium. In conditioned medium A, B, C and D respectively represent 2500, 5000, 10.000 or 20.000 BM-MNCs, the amount of cells that were used to produce the conditioned medium. Datapoints represent four(A) or three(B, C) technical replicates, and are presented as mean  $\pm$  SEM. Non-significant, by One-Way ANOVA.

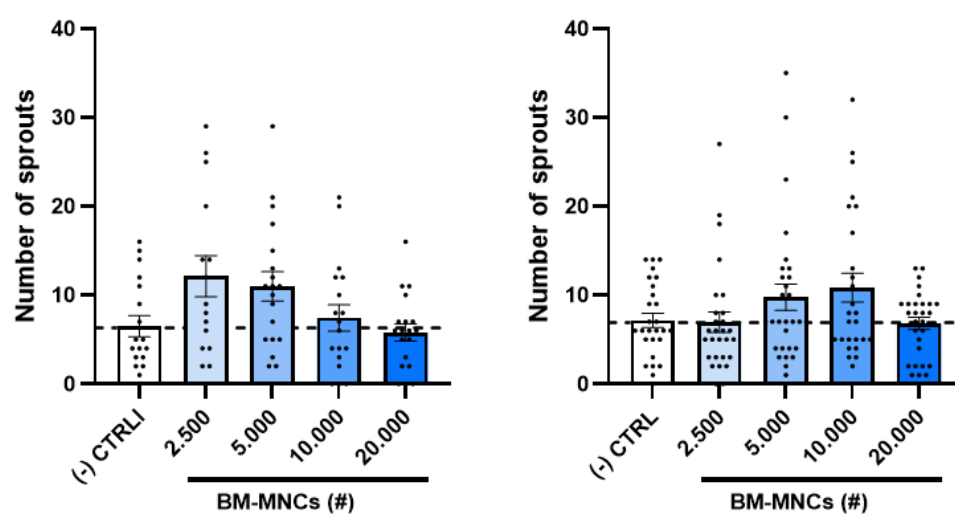

**Supplemental Figure S7.** Quantification of neovessel sprouts of mice aortic rings after treatment with BM-MNCs (2.500, 5.000, 10.000 or 20.000 cells added). Data are presented as mean  $\pm$  SEM with datapoints in 30-fold. Non-significant by Kruskal-Wallis test.
